# Supplementary material for: Importance of the Sequence-Directed DNA Shape for Specific Binding Site Recognition by the Estrogen-Related Receptor
Source: PubMed Central journal article supplement (PMC5476932; doi:10.3389/fendo.2017.00140), 2017-06-20
Supplement: Table_1.pdf [file Table_1.pdf]

**Table S1. List of the DNA sequences used in the different studies**

| DNA name (length)        | Sequence                                                                                                   | RE type/gene         |
|--------------------------|------------------------------------------------------------------------------------------------------------|----------------------|
| <i>tra</i> ERRE (13)     | GC <u>TCAAGGTCAC</u><br>CG <u>AGTTCCAGTG</u>                                                               | ERRE/TRalpha         |
| <i>tra</i> ERRE (26)     | CTG <u>TCAAGGTCA</u> CACAGTGAGTTACC<br>GAC <u>AGTTCCAGT</u> GTGTCACTCAATGG                                 | ERRE/TRalpha         |
| <i>tra</i> ERRE (29)     | AATTG <u>TCAAGGTCA</u> CACAGTGAGTTACCG<br>AAC <u>AGTTCCAGT</u> GTGTCACTCAATGGCTT                           | ERRE/TRalpha         |
| <i>tra</i> ERRE (33)     | CGATTT <u>TCAAGGTCA</u> CACAGTGAGTTACCGGC<br>GCTAAAC <u>AGTTCCAGT</u> GTGTCACTCAATGGCCG                    | ERRE/TRalpha         |
| <i>lf</i> ERRE (33)      | GGCACCT <u>TCAAGGTCA</u> TCTGCTGAAGAAGATAG<br>CCGTGGA <u>AGTTCCAGT</u> AGACGACTTCTTCTATC                   | ERRE/lactoferrin     |
| <i>tff1</i> ERRE (26)    | GGA <u>TTAAGGTCA</u> GGTTGGAGGAGACG<br>CCT <u>AATTCCAGT</u> CCAACCTCCTCTGC                                 | ERRE/tff1-ps2        |
| <i>tff1</i> ERE/IR3 (26) | CCTGCA <u>AGGTCA</u> CGGT <u>TGGCCA</u> CCCGC<br>GGACGT <u>TCCAGT</u> GCC <u>ACCGGT</u> GGGCG              | IR3/tff1-ps2         |
| <i>rb1cc1</i> IR3 (26)   | CCAAGA <u>AGGTCA</u> AAT <u>TCACCT</u> TGGGC<br>GGTTCT <u>TCCAGT</u> TTA <u>AGTGGA</u> ACCCG               | IR3/rb1cc1           |
| <i>rb1cc1</i> IR3 (33)   | TCCGCAAAGA <u>AGGTCA</u> AAT <u>TCACCT</u> TGGGAAAG<br>AGGCGTTTCT <u>TCCAGT</u> TTA <u>AGTGGA</u> ACCCTTTC | IR3/rb1cc1           |
| embERRE/IR3 (26)         | ATG <u>TCAAGGTCA</u> CCGTGACCTTTACG<br>TAC <u>AGTTCCAGT</u> GGCACTGGA AATGC                                | embedded<br>ERRE/IR3 |
| embERRE/IR3 (29)         | ATTG <u>TCAAGGTCA</u> CCGTGACCTTTACCGA<br>AAC <u>AGTTCCAGT</u> GGCACTGGA AATGGCTT                          | embedded<br>ERRE/IR3 |

|                     |                                                                                         |                            |
|---------------------|-----------------------------------------------------------------------------------------|----------------------------|
| embERRE/IR3 (33)    | GAAATTG <u>TCAAGGTCA</u> CCGTGACCTTTACCGCC<br>CTTTAAC <u>AGTTCCAGT</u> GGCACTGGAATGGCGG | embedded<br>ERRE/IR3       |
| abcc5 ERRE/IR3 (26) | CCG <u>TGAAGGTCA</u> TCGTAGCCCGCGTC<br>GGCACTTCCAGTAGCATCGGGCGCAG                       | embedded<br>ERRE/IR3/abcc5 |
| 5'tff (26)          | CCTGCAAGGTCACCGTGACCTTTACG<br>GGACGT <u>TCCAGT</u> GGCACTGGAATGC                        | Chimera                    |
| 5'emb (26)          | ATG <u>TCAAGGTCA</u> CGGTGGCCACCCGC<br>TACAGTTCCAGTGCCACCGGTGGGCG                       | Chimera                    |
| destabPu (26)       | ATG <u>TCAAGGTCA</u> CCGTGACCACCACG<br>TACAGTTCCAGTGGCACTGGTGGTGC                       | mutant                     |
| Pu (26)             | CCTGCAAGGTCACGGTGGCCTTTCGC<br>GGACGT <u>TCCAGT</u> GCCACCGGAAGCG                        | mutant                     |
| IR3mutA7T(26)       | CCTGCAAGGTCACGGTGGCCTCCCGC<br>GGACGT <u>TCCAGT</u> GCCACCGGAGGGCG                       | mutant                     |
| embmutT7A(26)       | ATG <u>TCAAGGTCA</u> CCGTGACCAATTACG<br>TAC <u>AGTTCCAGT</u> GGCACTGGTAATGC             | mutant                     |
| 3'IR3TAA(26)        | ATG <u>TCAAGGTCA</u> CGGTGGCCATTAGC<br>TACAGTTCCAGTGCCACCGGT <u>AATCG</u>               | mutant                     |
