# Supplementary material for: Importance of the Sequence-Directed DNA Shape for Specific Binding Site Recognition by the Estrogen-Related Receptor
Source: PubMed Central journal article supplement (PMC5476932; doi:10.3389/fendo.2017.00140), 2017-06-20
Supplement: Table_2.pdf [file Table_2.pdf]

**Table S2. List of the measured masses by ESI-MS**

| Samples                                    | Truncated<br>DNA RE<br>(Da) <sup>#</sup> | DNA RE<br>(Da) <sup>#</sup> | DNA RE<br>dimer<br>(Da) <sup>#</sup> | ERR $\alpha$ -<br>DBD -<br>Truncated<br>DNA 1 :1<br>complex<br>(Da) <sup>#</sup> | ERR $\alpha$ -<br>DBD +<br>DNA 1 :1<br>complex<br>(Da) <sup>#</sup> | ERR $\alpha$ -<br>DBD +<br>DNA 2:1<br>complex<br>(Da) <sup>#</sup> |
|--------------------------------------------|------------------------------------------|-----------------------------|--------------------------------------|----------------------------------------------------------------------------------|---------------------------------------------------------------------|--------------------------------------------------------------------|
| <i>tff1</i> ERE/IR3                        | -                                        | 15 947                      | -                                    | -                                                                                | 27 893                                                              | -                                                                  |
| ERR $\alpha$ -DBD + embERRE/IR3            | -                                        | 15 941                      | 31 883                               | -                                                                                | 27 885                                                              | 39 829                                                             |
| ERR $\alpha$ -DBD + 5tff <sup>r</sup>      | -                                        | 15 943                      | 31 887                               | -                                                                                | 27 888                                                              | 39 831                                                             |
| ERR $\alpha$ -DBD + 5'emb                  | 15 327                                   | 15 945                      | -                                    | 27 738                                                                           | 27 889                                                              | -                                                                  |
| ERR $\alpha$ -DBD + <i>tra</i> ERRE (29)   | -                                        | 17 794                      | -                                    | 29 737                                                                           | -                                                                   | -                                                                  |
| ERR $\alpha$ -DBD embERRE/IR3(29)          | 16 977                                   | 17 794                      | 28 921                               | 29 738                                                                           | 40 866                                                              | 41 686                                                             |
| ERR $\alpha$ -DBD embERRE/IR3(33)          | -                                        | 20 268                      | -                                    | 32 212                                                                           | -                                                                   | 44 157                                                             |
| ERR $\alpha$ -DBD + <i>rb1cc1</i> IR3 (33) | -                                        | 20 265                      | -                                    | 32 209                                                                           | -                                                                   | 44 153                                                             |

<sup>#</sup>Mass uncertainty  $\pm$  1 Da
